# Supplementary material for: Machine learning: an approach to preoperatively predict PD-1/PD-L1 expression and outcome in intrahepatic cholangiocarcinoma using MRI biomarkers
Source: PubMed Central journal article supplement — ESMO Open. 2020 Nov 25;5(6):e000910. doi: 10.1136/esmoopen-2020-000910 (PMC7689588; doi:10.1136/esmoopen-2020-000910), 2020-11-25
Supplement: esmoopen-2020-000910supp003.pdf [file esmoopen-2020-000910supp003.pdf]

### Imaging acquisition

MRI scans were conducted (Trio, 3.0T, Siemens). The routine MRI sequences included T1 weighted imaging (T1WI) in- and out-of-phase, fat-suppressed T2 weighted imaging (T2WI), diffusion weighted imaging (DWI), and dynamic multiphase enhanced. The contrast agent (Omniscan, GE Healthcare, Ireland) was injected at a dose of 0.2 ml/kg using a rate of 3 ml/s and was then followed by a 30 ml saline flush. The arterial phase (AP) was delayed by 20–35 s and the portal vein phase (PVP) was 60–70 s.

### MRI sequences and parameters

| Parameters                       | Vibe    | T1WI    | T2WI    | DWI     |
|----------------------------------|---------|---------|---------|---------|
| Repetition time(msec)            | 4.03    | 181     | 4480    | 6000    |
| Echo time (msec)                 | 1.43    | 2.2     | 102     | 73      |
| Field of view (cm <sup>2</sup> ) | 42*25   | 45*23   | 42*26   | 39*28   |
| Scan matrix                      | 320*133 | 256*106 | 320*157 | 192*110 |
| Slice thickness (mm)             | 2.3     | 6       | 6       | 6       |
| Slice gap (mm)                   | -       | 2       | 2       | 2       |
| Motion compensation              | No      | No      | No      | No      |
| Flip angle                       | 9       | 65      | 140     | 90      |
| Number of slices                 | 64      | 25      | 25      | 23      |
| Number of excitation             | 1       | 1       | 1       | 1, 2    |
| Fat saturation                   | Yes     | No      | Yes     | Yes     |

b=0、50、500、800、1000 s/mm<sup>2</sup>; Vibe, volume interpolated breath-hold examination; WI, weighted imaging DWI, diffusion weighted imaging.
