# Supplementary material for: Machine learning: an approach to preoperatively predict PD-1/PD-L1 expression and outcome in intrahepatic cholangiocarcinoma using MRI biomarkers
Source: PubMed Central journal article supplement — ESMO Open. 2020 Nov 25;5(6):e000910. doi: 10.1136/esmoopen-2020-000910 (PMC7689588; doi:10.1136/esmoopen-2020-000910), 2020-11-25
Supplement: esmoopen-2020-000910supp013.pdf [file esmoopen-2020-000910supp013.pdf]

**Table S2: Radiomics features for prediction of PD-1**

|            |                                                       | PD-1     |                   |         |
|------------|-------------------------------------------------------|----------|-------------------|---------|
|            | Radiomics features                                    | $\beta$  | OR(95%CI)         | P-value |
| <b>AP</b>  | Correlation_AllDirection_offset4_SD                   | 3.0837   | 2.74(1.21,6.23)   | < 0.001 |
|            | GLCMEnergy_AllDirection_offset1_SD                    | 1.0194   | 2.8(1.07,7.31)    | 0.564   |
|            | GLCMEnergy_angle90_offset7                            | 3.9965   | 5.97(0.09,387.02) | 0.012   |
|            | GLCMEntropy_AllDirection_offset1_SD                   | -0.1106  | 0.68(0.38,1.23)   | 0.668   |
|            | ShortRunEmphasis_AllDirection_offset1_SD              | -0.7256  | 0.83(0.49,1.43)   | 0.345   |
|            | ShortRunHighGreyLevelEmphasis_AllDirection_offset1_SD | -0.3688  | 0.75(0.46,1.22)   | 0.679   |
|            | ShortRunHighGreyLevelEmphasis_AllDirection_offset7_SD | -2.1145  | 0.68(0.32,1.47)   | 0.055   |
|            | ShortRunLowGreyLevelEmphasis_AllDirection_offset1_SD  | -80.2304 | 0.21(0.01,6.33)   | 0.002   |
|            | Compactness2                                          | 0.4204   | 1.24 (0.83,1.86)  | 0.112   |
|            | SmallAreaEmphasis                                     | -0.593   | 0.61(0.39,0.94)   | 0.114   |
| <b>PVP</b> | MeanDeviation                                         | 0.2837   | 1.33 (0.81,2.19)  | 0.255   |
|            | Kurtosis                                              | -0.7574  | 0.47 (0.23,0.96)  | 0.025   |
|            | ClusterShade_AllDirection_offset7_SD                  | -0.231   | 0.79 (0.46,1.36)  | 0.386   |
|            | Correlation_angle0_offset7                            | -0.9976  | 0.37 (0.13,1.01)  | 0.048   |
|            | Correlation_angle45_offset7                           | 0.6236   | 1.87 (0.73,4.76)  | 0.155   |
|            | Correlation_angle90_offset7                           | 0.2845   | 1.33 (0.69,2.56)  | 0.394   |
|            | GLCMEnergy_AllDirection_offset7_SD                    | 1.0634   | 2.9 (0.22,37.45)  | 0.023   |
|            | GLCMEntropy_AllDirection_offset4_SD                   | 0.1882   | 1.21 (0.71,2.05)  | 0.471   |
|            | GLCMEntropy_angle45_offset7                           | 0.8245   | 2.28 (1.14,4.56)  | 0.014   |

|                                                      |          |                                                    |       |
|------------------------------------------------------|----------|----------------------------------------------------|-------|
| HaralickCorrelation_angle135_offset7                 | -0.3793  | 0.68 (0.35,1.34)                                   | 0.262 |
| Inertia_AllDirection_offset7_SD                      | 0.1013   | 1.11 (0.68,1.79)                                   | 0.682 |
| InverseDifferenceMoment_AllDirection_offset1_SD      | 0.5893   | 1.8 (0.83,3.89)                                    | 0.119 |
| HighGreyLevelRunEmphasis_AllDirection_offset4_SD     | 0.2423   | 1.27 (0.17,9.66)                                   | 0.769 |
| LongRunEmphasis_angle0_offset4                       | -0.4112  | 0.66 (0.28,1.55)                                   | 0.142 |
| LongRunHighGreyLevelEmphasis_angle135_offset7        | 0.0661   | 1.07 (0.55,2.06)                                   | 0.844 |
| ShortRunEmphasis_AllDirection_offset1_SD             | 0.8827   | 0.41 (0.15,1.18)                                   | 0.071 |
| ShortRunEmphasis_AllDirection_offset7_SD             | -0.3788  | 0.68 (0.21,2.21)                                   | 0.51  |
| ShortRunLowGreyLevelEmphasis_AllDirection_offset7_SD | 293.5539 | 3.08190842166908e+127(0,<br>6.45419129338163e+283) | 0.008 |
| Sphericity                                           | -0.3871  | 0.68 (0.37,1.24)                                   | 0.205 |
| SmallAreaEmphasis                                    | 0.3591   | 1.43 (0.75,2.72)                                   | 0.271 |

PD-1, programmed cell death protein 1; AP, arterial phase; PVP, portal vein phase; OR, odds ratio; CI, confidence intervals.
