# Supplementary figures and images for: Machine learning: an approach to preoperatively predict PD-1/PD-L1 expression and outcome in intrahepatic cholangiocarcinoma using MRI biomarkers
Source: PubMed Central journal article supplement — ESMO Open. 2020 Nov 25;5(6):e000910. doi: 10.1136/esmoopen-2020-000910 (PMC7689588; doi:10.1136/esmoopen-2020-000910), 2020-11-25

# Feature selection for predicting overall survival

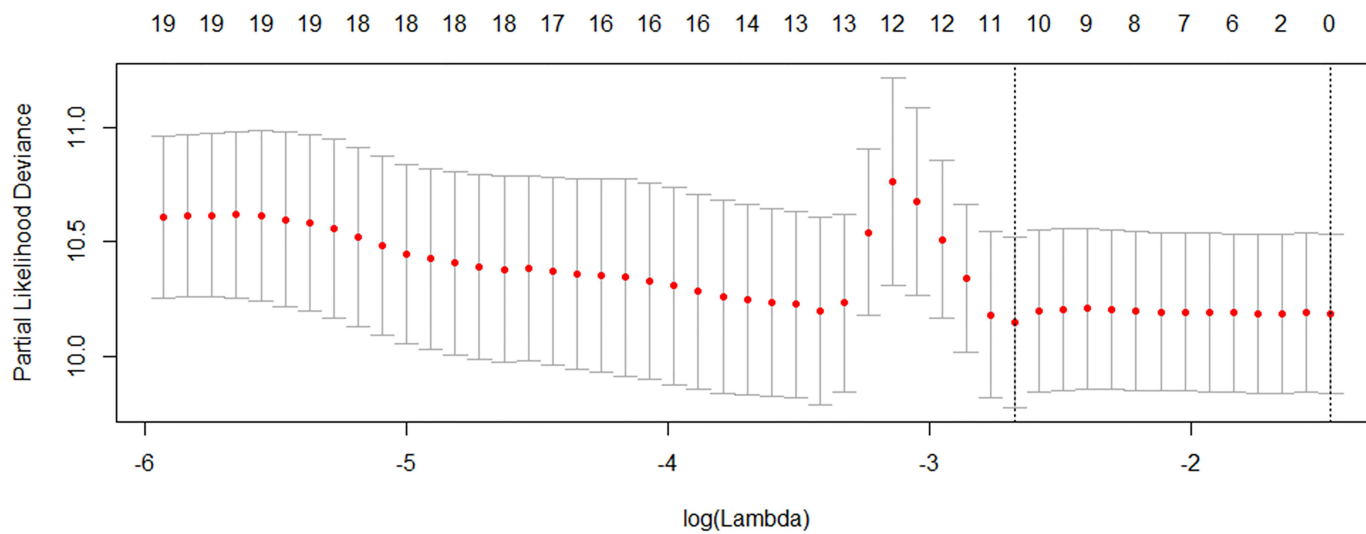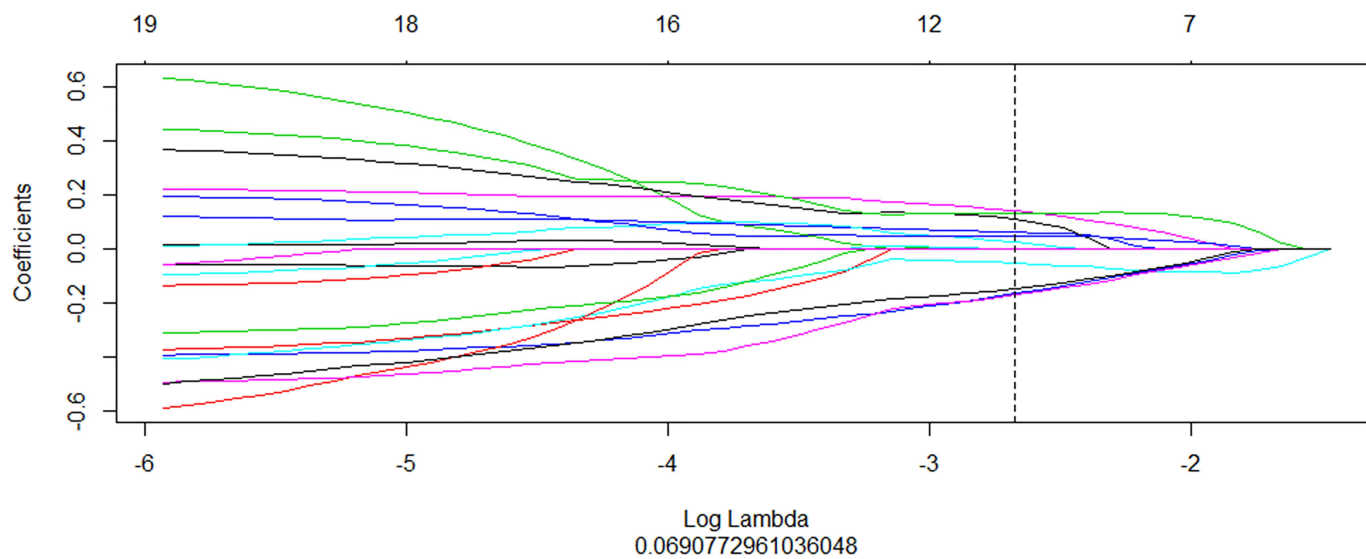

Supplement: esmoopen-2020-000910supp009.pdf [file esmoopen-2020-000910supp009.pdf]
